# Supplementary material
Source: PubMed Central journal article supplement (PMC9486638)
Supplement: jamapediatr-e223396-s001.pdf [file jamapediatr-e223396-s001.pdf]

## Supplemental Online Content

Austin AE, Naumann RB, Simmons E. Association of state child abuse policies and mandated reporting policies with prenatal and postpartum care among women who engaged in substance use during pregnancy. *JAMA Pediatr*. Published online September 19, 2022.  
doi:10.1001/jamapediatrics.2022.3396

**eTable 1.** State Prenatal Substance Use Policy Categorization

**eFigure.** Conceptual Diagram

**eTable 2.** Data Sources for State-Level Covariates

**eTable 3.** Mean Difference in Month of Gestation at Prenatal Care Initiation by State Prenatal Substance Use Policies

**eTable 4.** Risk Ratios Comparing Adequacy of Prenatal Care and Receipt of a Postpartum Health Care Visit by State Prenatal Substance Use Policies

**eTable 5.** E-Values for Observed Associations

This supplemental material has been provided by the authors to give readers additional information about their work.

**eTable 1. State Prenatal Substance Use Policy Categorization**

| <b>State</b>  | <b>Year</b> | <b>Child abuse policy year<br/>in relation to state-years in data</b> | <b>Mandated reporting policy year<br/>in relation to state-years in data</b> | <b>Policy categorization</b>   |
|---------------|-------------|-----------------------------------------------------------------------|------------------------------------------------------------------------------|--------------------------------|
| Alaska        | 2016        |                                                                       | Pre-2016                                                                     | Mandated reporting policy only |
| Alaska        | 2017        |                                                                       | Pre-2016                                                                     | Mandated reporting policy only |
| Alaska        | 2018        |                                                                       | Pre-2016                                                                     | Mandated reporting policy only |
| Alaska        | 2019        |                                                                       | Pre-2016                                                                     | Mandated reporting policy only |
| Alabama       | 2019        | Pre-2019                                                              |                                                                              | Child abuse policy only        |
| Colorado      | 2019        | Pre-2019                                                              |                                                                              | Child abuse policy only        |
| Connecticut   | 2019        | Pre-2019                                                              |                                                                              | Child abuse policy only        |
| Georgia       | 2019        | Pre-2019                                                              | Pre-2019                                                                     | Both                           |
| Kansas        | 2017        |                                                                       |                                                                              | Neither policy                 |
| Kansas        | 2018        |                                                                       |                                                                              | Neither policy                 |
| Kansas        | 2019        |                                                                       |                                                                              | Neither policy                 |
| Kentucky      | 2017        |                                                                       | Pre-2017                                                                     | Mandated reporting policy only |
| Kentucky      | 2018        |                                                                       | Pre-2017                                                                     | Mandated reporting policy only |
| Kentucky      | 2019        | <i>End 2018</i>                                                       | Pre-2017                                                                     | Both policies                  |
| Louisiana     | 2019        | Pre-2019                                                              | Pre-2019                                                                     | Both policies                  |
| Massachusetts | 2019        |                                                                       | Pre-2019                                                                     | Mandated reporting policy only |
| Missouri      | 2016        | Pre-2016                                                              |                                                                              | Child abuse policy only        |
| Missouri      | 2017        | Pre-2016                                                              |                                                                              | Child abuse policy only        |
| Missouri      | 2018        | Pre-2016                                                              |                                                                              | Child abuse policy only        |
| Missouri      | 2019        | Pre-2016                                                              |                                                                              | Child abuse policy only        |
| Montana       | 2017        |                                                                       | Pre-2017                                                                     | Mandated reporting policy only |
| North Dakota  | 2017        | Pre-2017                                                              | Pre-2017                                                                     | Both policies                  |
| North Dakota  | 2018        | Pre-2017                                                              | Pre-2017                                                                     | Both policies                  |
| North Dakota  | 2019        | Pre-2017                                                              | Pre-2017                                                                     | Both policies                  |
| Oklahoma      | 2016        | Pre-2016                                                              | Pre-2016                                                                     | Both policies                  |
| Oklahoma      | 2017        | Pre-2016                                                              | Pre-2016                                                                     | Both policies                  |
| Oregon        | 2019        |                                                                       |                                                                              | Neither policy                 |
| Pennsylvania  | 2019        |                                                                       |                                                                              | Mandated reporting policy only |
| Rhode Island  | 2019        |                                                                       | Pre-2019                                                                     | Both policies                  |
| South Dakota  | 2017        | Pre-2017                                                              |                                                                              | Child abuse policy only        |
| South Dakota  | 2018        | Pre-2017                                                              |                                                                              | Child abuse policy only        |
| Utah          | 2019        | Pre-2019                                                              | Pre-2019                                                                     | Both policies                  |
| Vermont       | 2016        |                                                                       |                                                                              | Neither policy                 |
| Vermont       | 2017        |                                                                       |                                                                              | Neither policy                 |
| Vermont       | 2018        |                                                                       |                                                                              | Neither policy                 |

|                                                                                                                                                                                                                                                                                    |      |          |          |                         |
|------------------------------------------------------------------------------------------------------------------------------------------------------------------------------------------------------------------------------------------------------------------------------------|------|----------|----------|-------------------------|
| Vermont                                                                                                                                                                                                                                                                            | 2019 |          |          | Neither policy          |
| Washington                                                                                                                                                                                                                                                                         | 2019 | Pre-2019 |          | Child abuse policy only |
| Wisconsin                                                                                                                                                                                                                                                                          | 2016 | Pre-2016 | Pre-2016 | Both policies           |
| Wisconsin                                                                                                                                                                                                                                                                          | 2017 | Pre-2016 | Pre-2016 | Both policies           |
| Wisconsin                                                                                                                                                                                                                                                                          | 2018 | Pre-2016 | Pre-2016 | Both policies           |
| Wisconsin                                                                                                                                                                                                                                                                          | 2019 | Pre-2016 | Pre-2016 | Both policies           |
| West Virginia                                                                                                                                                                                                                                                                      | 2016 |          |          | Neither policy          |
| West Virginia                                                                                                                                                                                                                                                                      | 2017 |          |          | Neither policy          |
| West Virginia                                                                                                                                                                                                                                                                      | 2018 |          |          | Neither policy          |
| Wyoming                                                                                                                                                                                                                                                                            | 2019 |          |          | Neither policy          |
| Of 45 state-years included in analyses, 10 state-years had a child abuse policy only (N=987 births), 9 state-years had a mandated reporting policy only (N=610 births), 14 state-years had both policies (N=1,276 births), and 12 state-years had neither policy (N=1,282 births). |      |          |          |                         |

**eFigure.** Conceptual Diagram

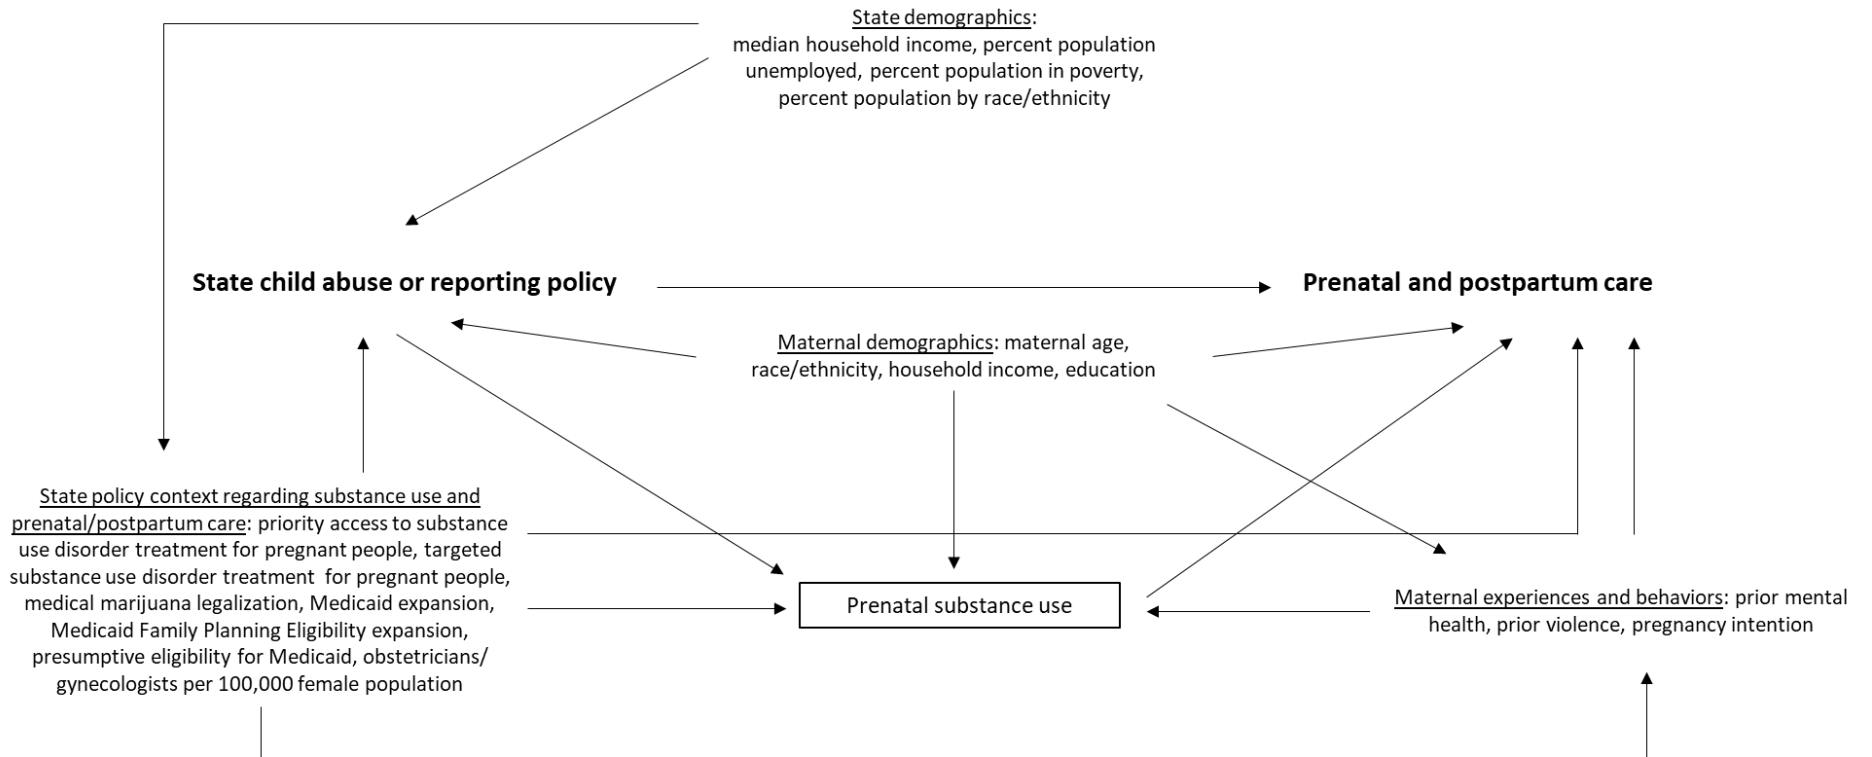

| <b>eTable 2. Data Sources for State-Level Covariates</b>                |                                                                                                                                                                                                                                                                                                                                                                                                                                                                                                                                                                                                                      |
|-------------------------------------------------------------------------|----------------------------------------------------------------------------------------------------------------------------------------------------------------------------------------------------------------------------------------------------------------------------------------------------------------------------------------------------------------------------------------------------------------------------------------------------------------------------------------------------------------------------------------------------------------------------------------------------------------------|
| <b>Covariate</b>                                                        | <b>Data source</b>                                                                                                                                                                                                                                                                                                                                                                                                                                                                                                                                                                                                   |
| Priority access to substance use disorder treatment for pregnant people | State policy texts obtained from the Guttmacher Institute                                                                                                                                                                                                                                                                                                                                                                                                                                                                                                                                                            |
| Targeted substance use disorder treatment programs for pregnant people  | State policy texts obtained from the Guttmacher Institute                                                                                                                                                                                                                                                                                                                                                                                                                                                                                                                                                            |
| Medical marijuana legalization                                          | National Conference of State Legislatures. State Medical Marijuana Laws. Available from <a href="https://www.ncsl.org/research/health/state-medical-marijuana-laws.aspx">https://www.ncsl.org/research/health/state-medical-marijuana-laws.aspx</a> .                                                                                                                                                                                                                                                                                                                                                                |
| Medicaid expansion                                                      | Kaiser Family Foundation. Statuses of State Medicaid Expansion Decisions. Available from <a href="https://www.kff.org/medicaid/issue-brief/status-of-state-medicaid-expansion-decisions-interactive-map">https://www.kff.org/medicaid/issue-brief/status-of-state-medicaid-expansion-decisions-interactive-map</a> .                                                                                                                                                                                                                                                                                                 |
| Medicaid Family Planning expansion                                      | Kaiser Family Foundation. Expanding Postpartum Medicaid Coverage. Available from <a href="https://www.kff.org/womens-health-policy/issue-brief/expanding-postpartum-medicaid-coverage">https://www.kff.org/womens-health-policy/issue-brief/expanding-postpartum-medicaid-coverage</a> .<br><br>The Guttmacher Institute. Medicaid Family Planning Eligibility Expansion. Available from <a href="https://www.guttmacher.org/print/state-policy/explore/medicaid-family-planning-eligibility-expansions">https://www.guttmacher.org/print/state-policy/explore/medicaid-family-planning-eligibility-expansions</a> . |
| Presumptive eligibility for Medicaid                                    | The Commonwealth Fund. State Policies to Improve Maternal Health Outcomes. Available from <a href="https://www.guttmacher.org/print/state-policy/explore/medicaid-family-planning-eligibility-expansions">https://www.guttmacher.org/print/state-policy/explore/medicaid-family-planning-eligibility-expansions</a> .                                                                                                                                                                                                                                                                                                |
| Number of obstetrician/gynecologists per 100,000 female population      | Health Resources & Services Administration. Area Health Resources Files. Available from <a href="https://data.hrsa.gov/topics/health-workforce/ahrf">https://data.hrsa.gov/topics/health-workforce/ahrf</a> .                                                                                                                                                                                                                                                                                                                                                                                                        |

| <b>eTable 3. Mean Difference in Month of Gestation at Prenatal Care Initiation by State Prenatal Substance Use Policies<sup>b</sup></b>                                                                                                                                                                                                                                                                                                                                                                                                                                                                                                                                                                                   |                    |                              |                               |                              |
|---------------------------------------------------------------------------------------------------------------------------------------------------------------------------------------------------------------------------------------------------------------------------------------------------------------------------------------------------------------------------------------------------------------------------------------------------------------------------------------------------------------------------------------------------------------------------------------------------------------------------------------------------------------------------------------------------------------------------|--------------------|------------------------------|-------------------------------|------------------------------|
|                                                                                                                                                                                                                                                                                                                                                                                                                                                                                                                                                                                                                                                                                                                           | Unadjusted $\beta$ | 95% confidence interval (CI) | Adjusted <sup>a</sup> $\beta$ | 95% confidence interval (CI) |
| Month of prenatal care initiation                                                                                                                                                                                                                                                                                                                                                                                                                                                                                                                                                                                                                                                                                         |                    |                              |                               |                              |
| Neither policy                                                                                                                                                                                                                                                                                                                                                                                                                                                                                                                                                                                                                                                                                                            | 0.00               |                              | 0.00                          |                              |
| Child abuse policy only                                                                                                                                                                                                                                                                                                                                                                                                                                                                                                                                                                                                                                                                                                   | 0.49               | 0.31, 0.67                   | 0.44                          | 0.10, 0.78                   |
| Mandated reporting policy only                                                                                                                                                                                                                                                                                                                                                                                                                                                                                                                                                                                                                                                                                            | 0.28               | -0.19, 0.75                  | 0.32                          | 0.04, 0.59                   |
| Both policies                                                                                                                                                                                                                                                                                                                                                                                                                                                                                                                                                                                                                                                                                                             | 0.08               | -0.19, 0.35                  | 0.40                          | 0.09, 0.72                   |
| <sup>a</sup> Adjusted for maternal age, education, race/ethnicity, per capita household income, pregnancy intention, mental health prior to pregnancy, and experiences of violence prior to pregnancy and state-level Presumptive Eligibility and Expanded Family Planning under Medicaid, Medicaid expansion, priority access to substance use disorder treatment and targeted substance use disorder treatment programs for pregnant people, priority access for substance use disorder treatment for pregnant people, medical marijuana legalization, and number of obstetricians/gynecologists per 100,000 female population.<br><sup>b</sup> Among 4,155 births to women who reported substance use during pregnancy |                    |                              |                               |                              |

| <b>eTable 4. Risk Ratios Comparing Adequacy of Prenatal Care and Receipt of a Postpartum Health Care Visit by State Prenatal Substance Use Policies</b>                                                                                                                                                                                                                                                                                                                                                                                                                                                                                         |                            |                              |                                       |                              |
|-------------------------------------------------------------------------------------------------------------------------------------------------------------------------------------------------------------------------------------------------------------------------------------------------------------------------------------------------------------------------------------------------------------------------------------------------------------------------------------------------------------------------------------------------------------------------------------------------------------------------------------------------|----------------------------|------------------------------|---------------------------------------|------------------------------|
|                                                                                                                                                                                                                                                                                                                                                                                                                                                                                                                                                                                                                                                 | Unadjusted risk ratio (RR) | 95% confidence interval (CI) | Adjusted <sup>a</sup> risk ratio (RR) | 95% confidence interval (CI) |
| Adequacy of prenatal care (adequate vs. not adequate)                                                                                                                                                                                                                                                                                                                                                                                                                                                                                                                                                                                           |                            |                              |                                       |                              |
| Neither policy                                                                                                                                                                                                                                                                                                                                                                                                                                                                                                                                                                                                                                  | 1.00                       |                              | 1.00                                  |                              |
| Child abuse policy only                                                                                                                                                                                                                                                                                                                                                                                                                                                                                                                                                                                                                         | 0.85                       | 0.75, 0.98                   | 0.85                                  | 0.79, 0.91                   |
| Mandated reporting policy only                                                                                                                                                                                                                                                                                                                                                                                                                                                                                                                                                                                                                  | 0.89                       | 0.70, 1.11                   | 0.94                                  | 0.87, 1.01                   |
| Both policies                                                                                                                                                                                                                                                                                                                                                                                                                                                                                                                                                                                                                                   | 1.00                       | 0.89, 1.12                   | 0.95                                  | 0.89, 1.03                   |
| Postpartum healthcare visit (received vs. not received)                                                                                                                                                                                                                                                                                                                                                                                                                                                                                                                                                                                         |                            |                              |                                       |                              |
| Neither policy                                                                                                                                                                                                                                                                                                                                                                                                                                                                                                                                                                                                                                  | 1.00                       |                              | 1.00                                  |                              |
| Child abuse policy only                                                                                                                                                                                                                                                                                                                                                                                                                                                                                                                                                                                                                         | 0.95                       | 0.89, 1.00                   | 0.89                                  | 0.82, 0.96                   |
| Mandated reporting policy only                                                                                                                                                                                                                                                                                                                                                                                                                                                                                                                                                                                                                  | 0.97                       | 0.88, 1.06                   | 0.89                                  | 0.80, 0.98                   |
| Both policies                                                                                                                                                                                                                                                                                                                                                                                                                                                                                                                                                                                                                                   | 1.02                       | 0.94, 1.12                   | 0.92                                  | 0.83, 1.02                   |
| <sup>a</sup> Adjusted for maternal age, education, race/ethnicity, per capita household income, pregnancy intention, mental health prior to pregnancy, and experiences of violence prior to pregnancy and state-level Presumptive Eligibility and Expanded Family Planning under Medicaid, Medicaid expansion, priority access to substance use disorder treatment and targeted substance use disorder treatment programs for pregnant people, medical marijuana legalization, and number of obstetricians/gynecologists per 100,000 female population.<br><sup>b</sup> Among 4,155 births to women who reported substance use during pregnancy |                            |                              |                                       |                              |

| <b>eTable 5. E-Values for Observed Associations</b> |                |
|-----------------------------------------------------|----------------|
| <b>Month of prenatal care initiation</b>            | <b>E-value</b> |
| Child abuse policy only                             | 1.78           |
| Reporting policy only                               | 1.55           |
| Both policies                                       | 1.67           |
| <b>Adequacy of prenatal care</b>                    | <b>E-value</b> |
| Child abuse policy only                             | 1.63           |
| Reporting policy only                               | 1.32           |
| Both policies                                       | 1.29           |
| <b>Postpartum visit</b>                             | <b>E-value</b> |
| Child abuse policy only                             | 1.56           |
| Reporting policy only                               | 1.50           |
| Both policies                                       | 1.39           |
